# Supplementary material for: Synthesis, characterization and optoelectronic investigations of bithiophene substituted 1,3,4-oxadiazole derivatives as green fluorescent materials
Source: Royal Society of Chemistry journal article supplement (doi:10.1039/c5ra14550c), 2015-01-01

## Synthesis, characterization and optoelectronic investigations of bithiophene substituted 1,3,4-oxadiazole derivatives as green fluorescent materials

Narahari Deshapande<sup>a</sup>, Ningaraddi S. Belavagi<sup>a</sup>, Manjunath G. Sunagar<sup>a</sup>, Supreet Gaonkar<sup>a</sup>,  
G. H. Pujar<sup>b</sup>, S. R. Inamdar<sup>b</sup> and Imtiyaz Ahmed M. Khazi<sup>\*a</sup>

<sup>a</sup> CPEPA, Department of Chemistry, Karnatak University, Dharwad 580003, Karnataka, India

<sup>b</sup> CPEPA, Department of Physics, Karnatak University, Dharwad 580003, Karnataka, India

### Table of Contents:

| S. No | Contents                                                             | Page. No  |
|-------|----------------------------------------------------------------------|-----------|
| 1     | General procedure for the synthesis of intermediates <b>1(a-e)</b> . | S2 - S3   |
| 2     | <sup>1</sup> H NMR of intermediates <b>1(a-e)</b> .                  | S4 - S6   |
| 3     | <sup>1</sup> H NMR of compounds <b>2a, 2d &amp; 2e</b> .             | S7 - S8   |
| 4     | <sup>13</sup> C NMR of compounds <b>2a, 2d &amp; 2e</b> .            | S9 - S10  |
| 5     | Mass Spectrum of compounds <b>2a, 2d &amp; 2e</b> .                  | S11 - S12 |

### General procedure for the synthesis of intermediate 1(a-e).

4-bromobenzohydrazide (5.0 g, 2.50 mmol) and different aryl/heteroaryl carboxylic acids (5.0 g, 2.5 mmol) were dissolved in POCl<sub>3</sub> (50 ml). The mixture was refluxed for 12 h at 100 °C. Completion of the reaction was monitored by TLC. After completion of the reaction, allowed the reaction mixture to reach room temperature, the quenching of reaction mixture in ice water bath was carefully carried out under efficient fume hood. The solid that separated was collected by filtration and then washed with saturated NaHCO<sub>3</sub> solution to remove excess of un-reacted carboxylic acid, the crude product was subjected to re-crystallization from ethanol, followed by column chromatography on silica gel using plane chloroform as an eluting solvent to obtain desired compound in 80-85% yield.

### Synthesis of 2-(4-bromophenyl)-5-(4-tert-butylphenyl)-1,3,4-oxadiazole (1a)<sup>31</sup>

White solid, yield: 88 %. MP = 146-147 °C. <sup>1</sup>H NMR (400 MHz, CDCl<sub>3</sub>) δ: 8.09 (d, *J* = 8.4 Hz, 2H), 8.05 (d, *J*=8.4 Hz, 2H), 7.72 (d, *J*= 8.4 Hz, 2H), 7.59 (d, *J*=8.0 Hz, 2H), 1.40 (s, 9H); <sup>13</sup>C NMR (100 MHz, CDCl<sub>3</sub>) δ: 164.12, 150.17, 132.35, 130.01, 126.95, 125.70, 125.18, 123.22, 39.89, 31.25; LC-MS (ESI): *m/z* calculated for C<sub>18</sub>H<sub>17</sub>BrN<sub>2</sub>O [M+H] 358.24. Found 358.47; Anal. Calcd (%) for C<sub>18</sub>H<sub>17</sub>BrN<sub>2</sub>O: C 60.52, H 4.84, N 7.84. Found: C 60.58, H 4.83, N 7.75.

### Synthesis of 2-(4-bromophenyl)-5-(thiophen-2-yl)-1,3,4-oxadiazole (1b)<sup>32</sup>

<sup>1</sup>H NMR (400 MHz, CDCl<sub>3</sub>) δ: 8.03 (d, *J*=8.8 Hz, 2H), 7.88 (d, *J*=4 Hz, 1H), 7.72 (d, *J*=8.4 Hz, 2H), 7.62 (d, *J*=4.8, 1H), 7.24 (t, *J*=4.4 Hz, 1H); <sup>13</sup>C NMR (100 MHz, CDCl<sub>3</sub>) δ: 164.31, 161.10, 132.22, 129.71, 127.95, 127.42, 125.44, 125.10, 123.15; LC-MS (ESI): *m/z* calculated for C<sub>12</sub>H<sub>7</sub>BrN<sub>2</sub>OS [M+H] 308.17. Found 308.31; Anal. Calcd (%) for C<sub>12</sub>H<sub>7</sub>BrN<sub>2</sub>OS: C 46.92, H 2.30, N 9.12. Found: C 46.84, H 2.35, N 9.27.

### Synthesis of 2-(4-bromophenyl)-5-(biphenyl)-1,3,4-oxadiazole (1c)<sup>33</sup>

White solid, yield: 82 %. Mp = 204-206 °C. <sup>1</sup>H NMR (400 MHz, CDCl<sub>3</sub>) δ: 8.24(d, *J*=8.4 Hz, 2H), 8.07 (d, *J*=8.4 Hz, 2H), 7.791 (d, *J*=11.6 Hz, 2H), 7.716 (d, *J*=8.8, 2H), 7.683 (d, *J*=7.6, 2H), 7.450 (d, *J*=4, 2H), 7.508 (t, *J*=14.8, 1H); <sup>13</sup>C NMR (100 MHz, CDCl<sub>3</sub>) δ: 164.32, 136.44, 132.35, 130.01, 129.82, 128.61, 128.04, 127.91, 127.75, 125.28, 125.14,

123.21; LC-MS (ESI):  $m/z$  calculated for  $C_{20}H_{13}BrN_2O$  [M+H] 378.23. Found 378.37; Anal. Calcd (%) for  $C_{20}H_{13}BrN_2O$ : C 63.68, H 3.47, N 7.43. Found: C 63.72, H 3.51, N 7.46.

#### **Synthesis of 2-(4-bromophenyl)-5-(perfluorophenyl)-1,3,4-oxadiazole (1d)**

White solid, yield: 87 %. Mp = 203~204 °C.  $^1H$  NMR (400 MHz,  $CDCl_3$ )  $\delta$ : 7.926 (d,  $J=8.8$ , 2H), 7.627 (d,  $J=8.4$ , 2H);  $^{13}C$  NMR (100 MHz,  $CDCl_3$ )  $\delta$ : 164.58, 144.72, 143.44, 138.27, 132.56, 129.75, 125.22, 123.21, 120.51;  $^{19}F$  NMR (400 MHz,  $CDCl_3$ )  $\delta$ : -135.33, -147.23, -159.49; LC-MS (ESI):  $m/z$  calculated for  $C_{14}H_4BrF_5N_2O$  [M+H] 392.09, found 392.18; Anal. Calcd (%) for  $C_{14}H_4BrF_5N_2O$ : C 43.00, H 1.03, N 7.17. Found: C 43.13, H 1.15, N 7.22.

#### **Synthesis of 2-(4-bromophenyl)-5-(naphthalen-2-yl)-1,3,4-oxadiazole (1e)**<sup>34</sup>

White solid, yield: 85 %. Mp = 145-147 °C.  $^1H$  NMR (400 MHz,  $CDCl_3$ )  $\delta$ : 8.640(s, 1H), 8.212 (d,  $J=8.4$  Hz, 1H), 8.073 (d,  $J=8.4$  Hz, 2H), 8.002 (d,  $J=8.4$ , 1H), 7.923 (d,  $J=6.4$ , 2H), 7.719 (d,  $J=8.4$ , 2H), 7.615 (t,  $J=7.6$ , 1H);  $^{13}C$  NMR (100 MHz,  $CDCl_3$ )  $\delta$ : 164.41, 134.33, 134.10, 133.91, 132.34, 129.72, 128.63, 128.14, 126.30, 125.82, 125.33, 124.60, 123.11; LC-MS (ESI):  $m/z$  calculated for  $C_{18}H_{11}BrN_2O$  [M+H] 352.2 Found 352.25; Anal. Calcd (%) for  $C_{18}H_{11}BrN_2O$ : C 61.56, H 3.16, N 7.98. Found: C 61.61, H 3.14, N 7.87.

<sup>1</sup>H NMR of compounds 1a-e.

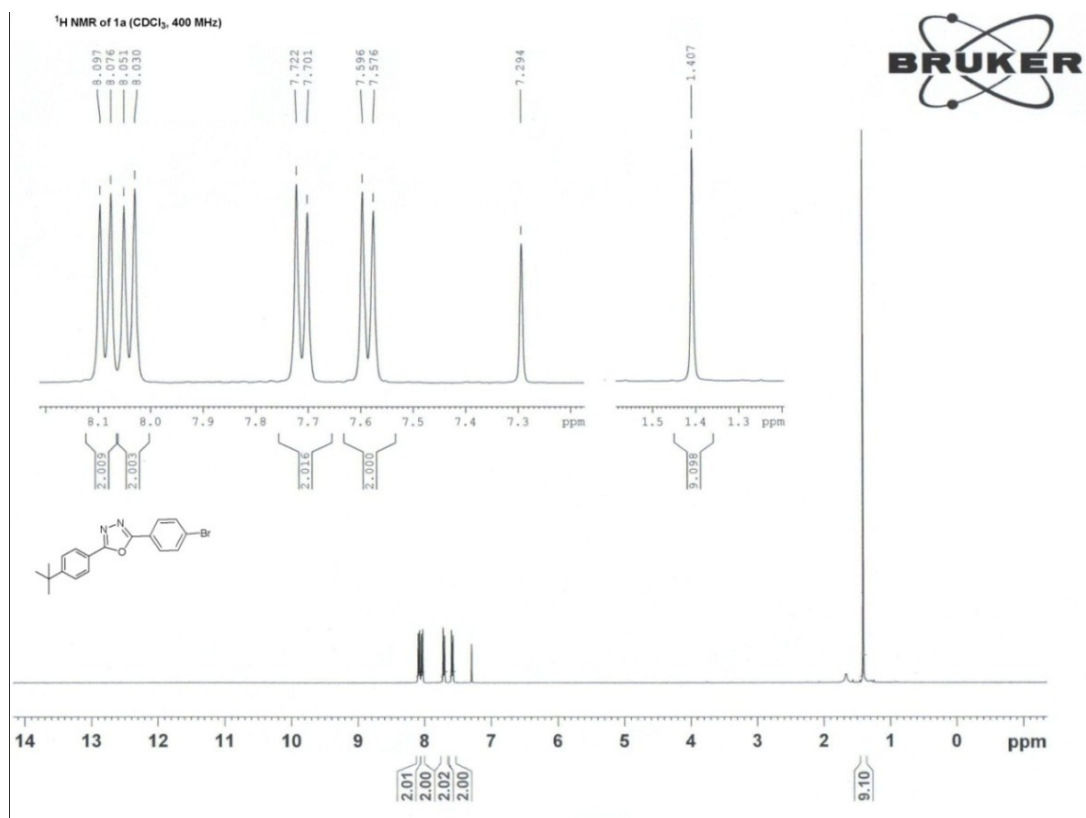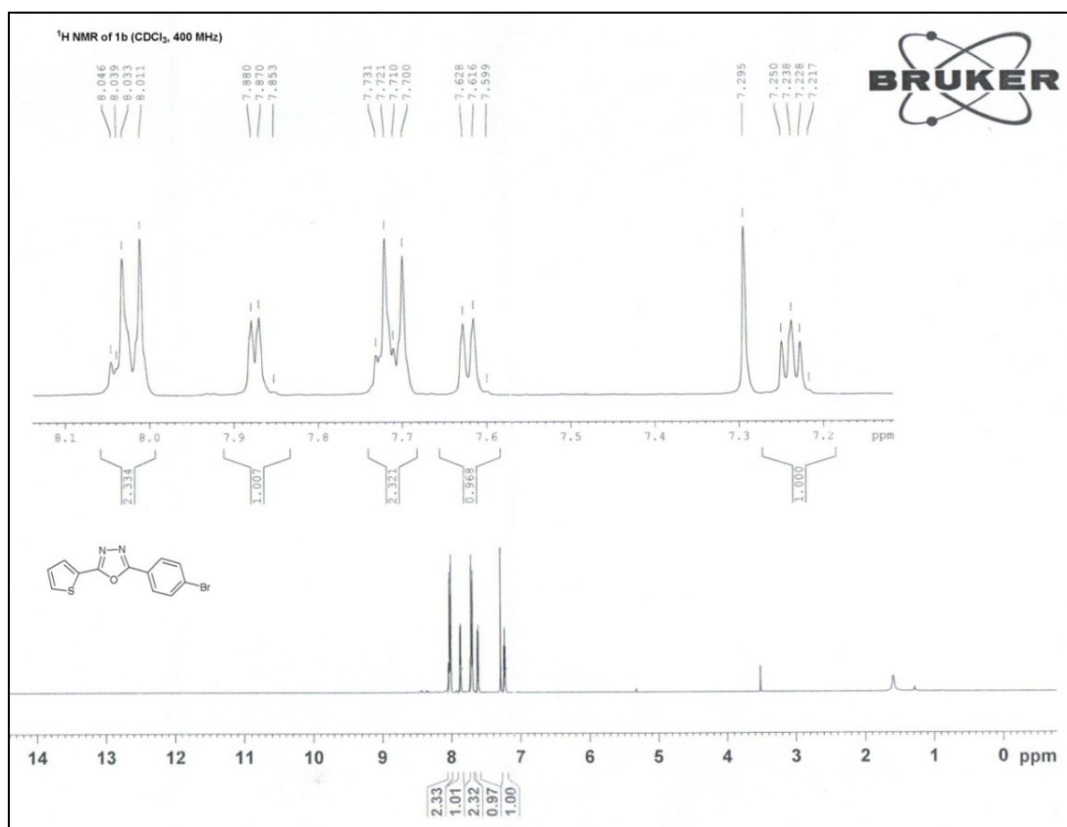

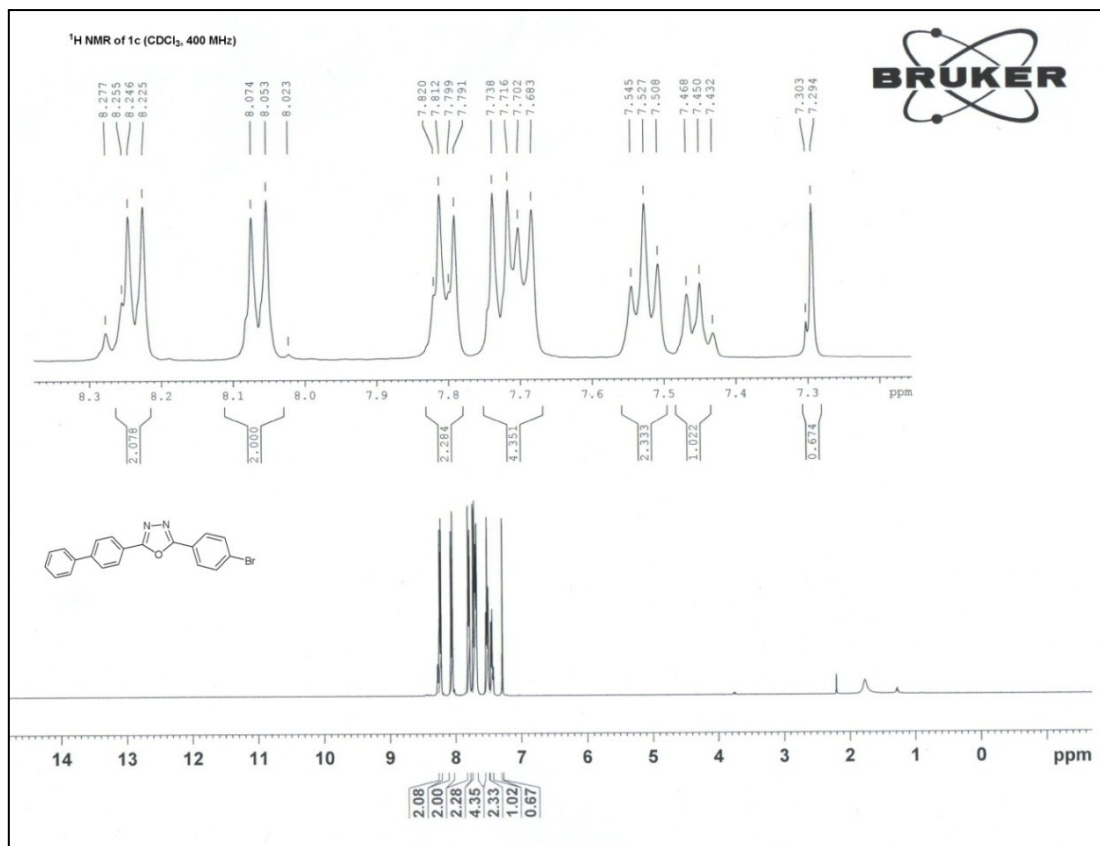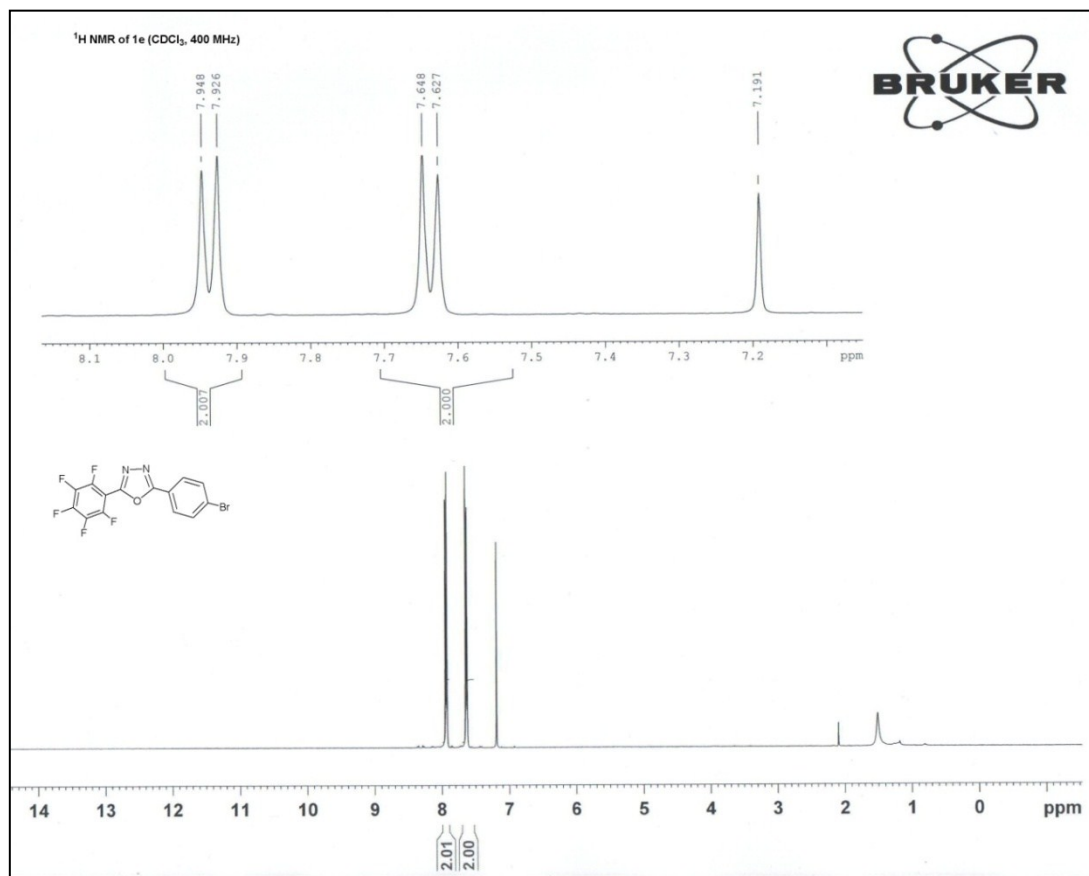

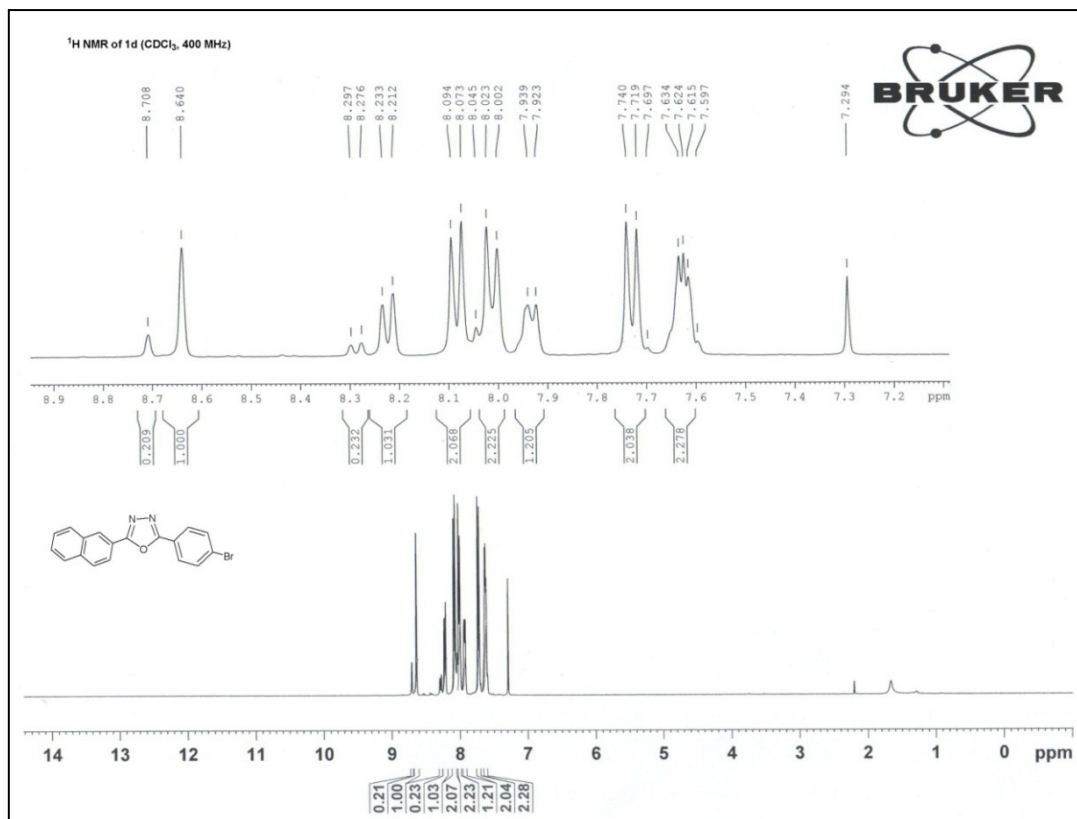

# <sup>1</sup>H NMR of compounds 2a, 2d & 2e.

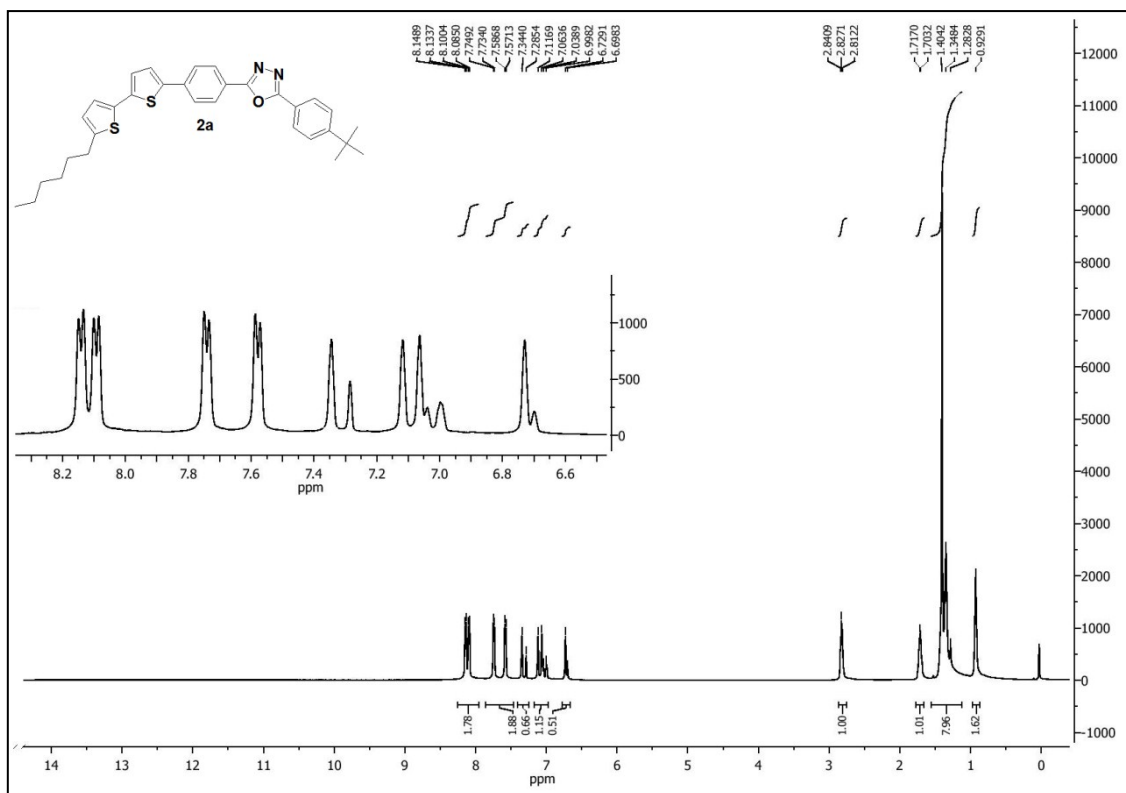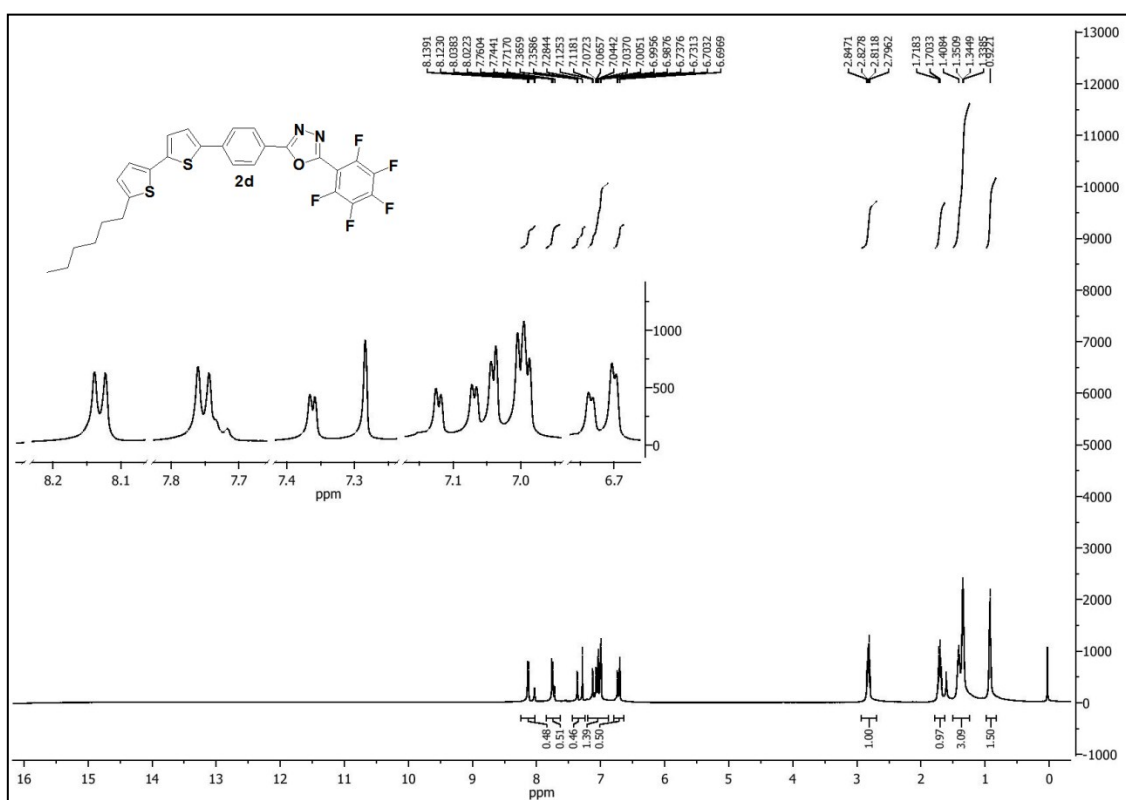





**<sup>13</sup>C NMR of compounds 2a, 2d & 2e.**

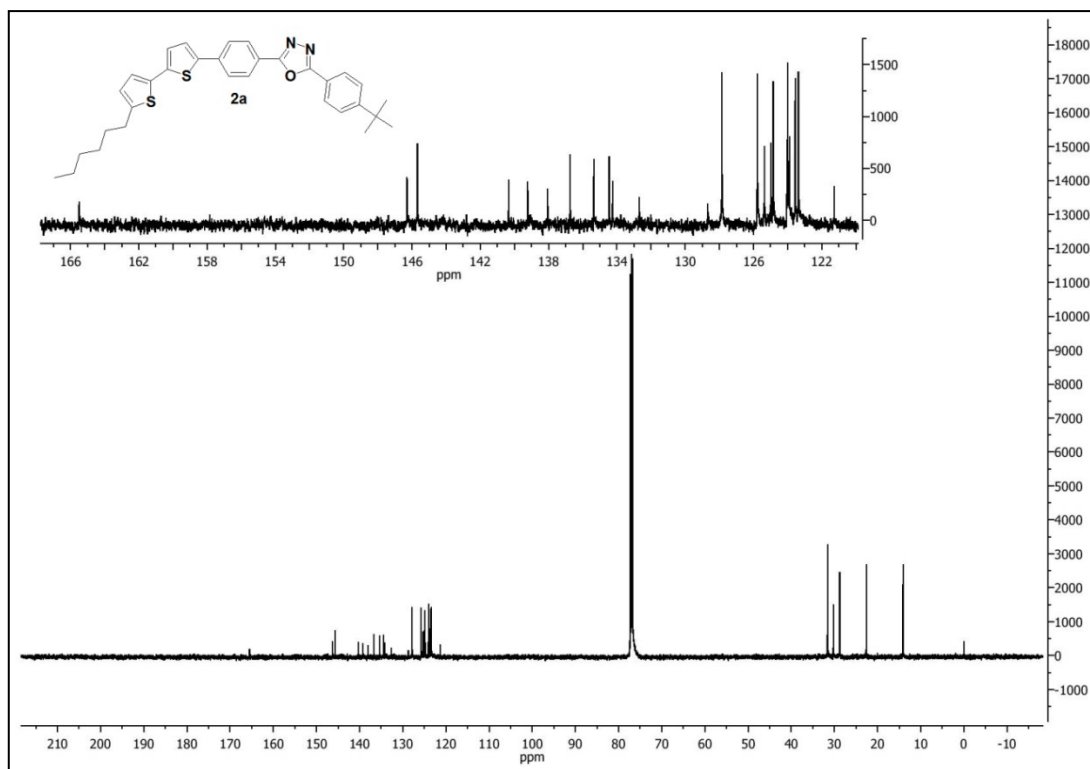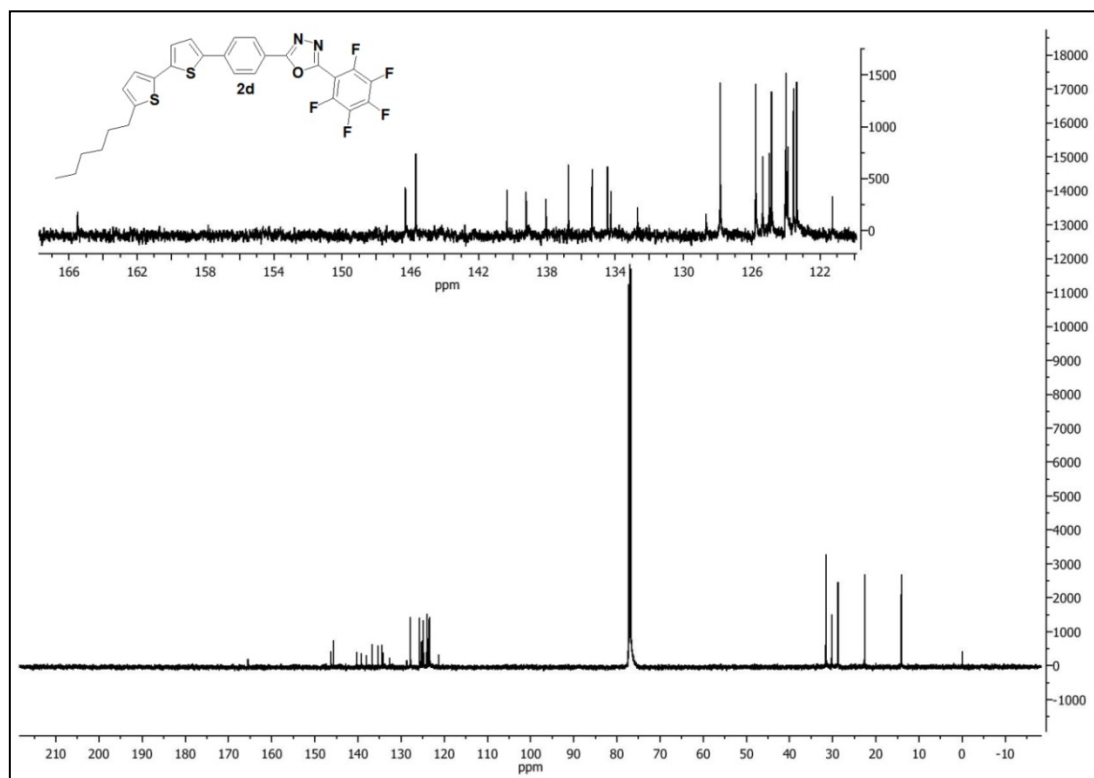

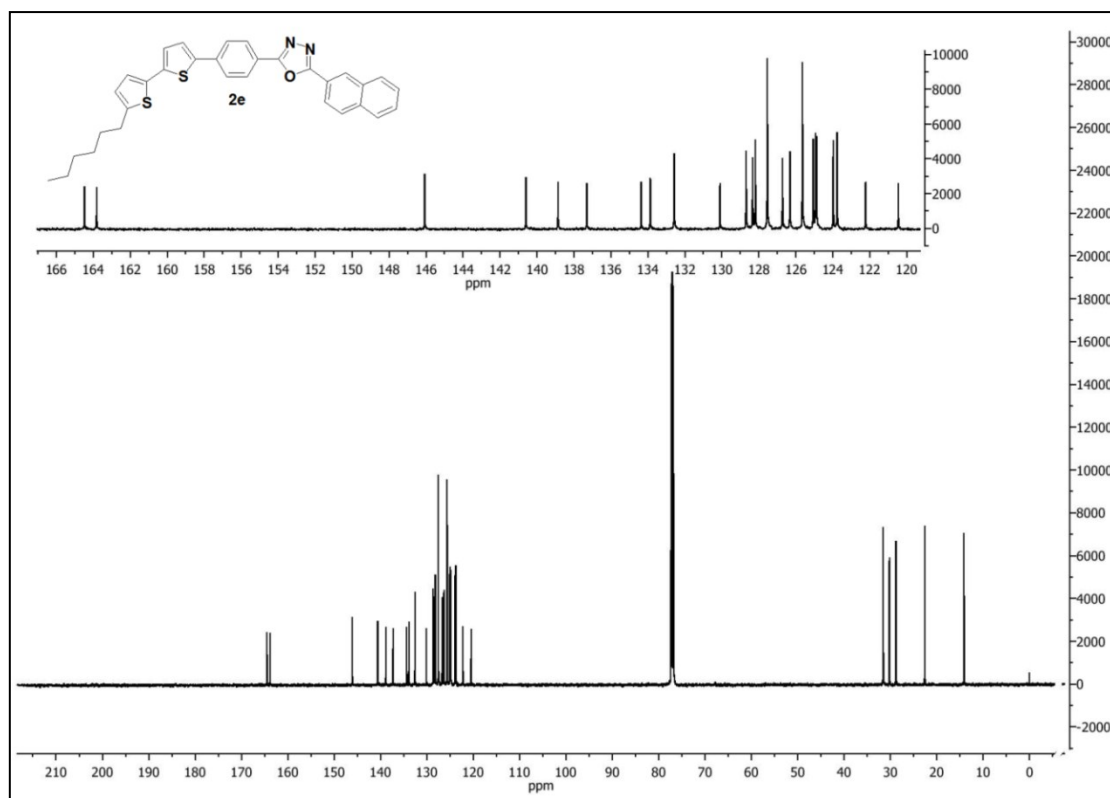

## Mass Spectrum of compounds 2a, 2d & 2e.

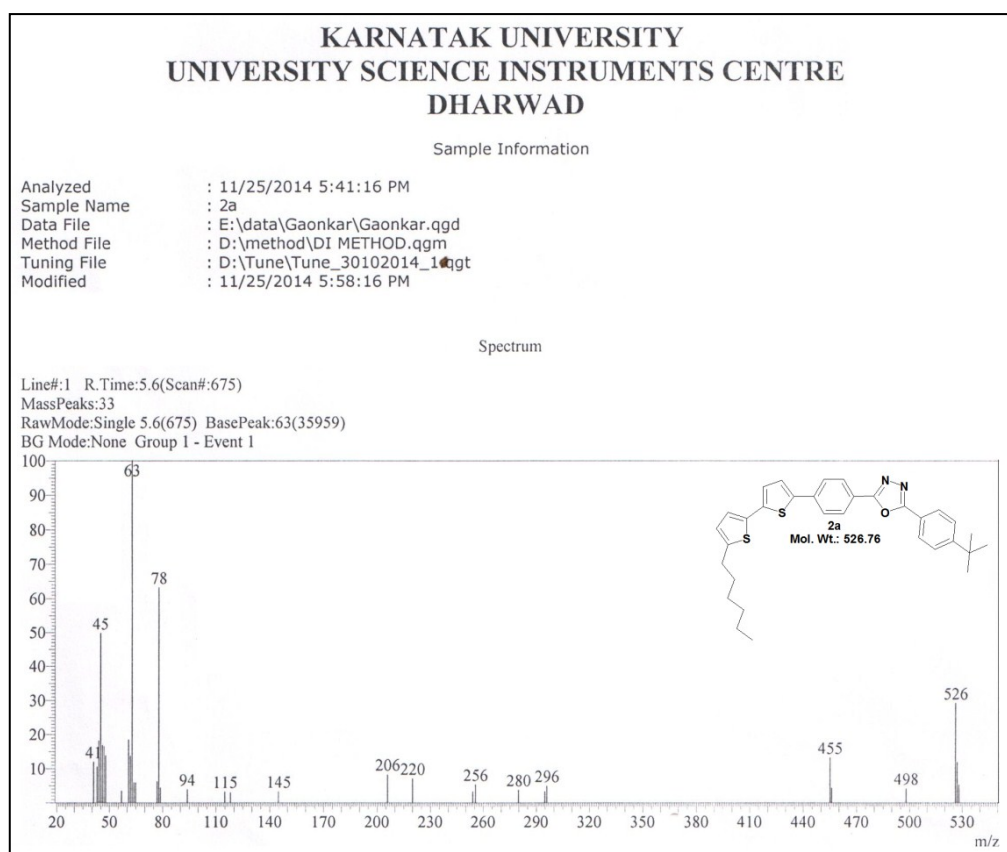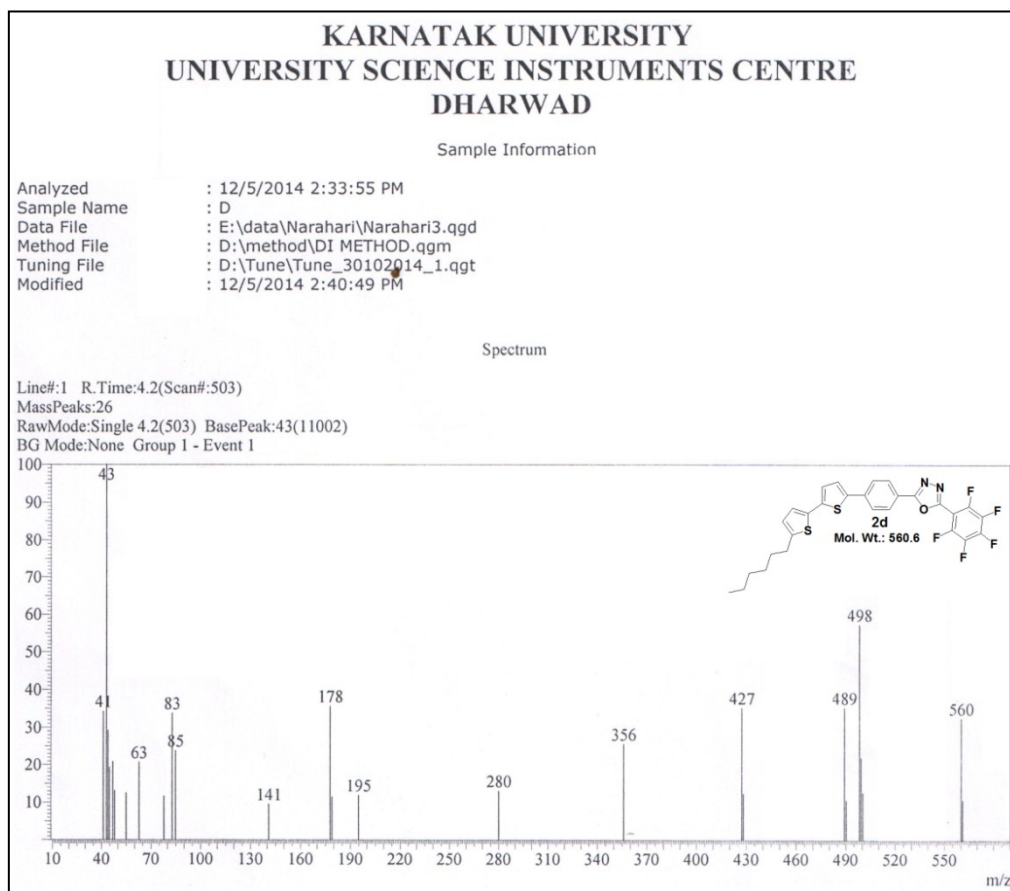

**KARNATAK UNIVERSITY  
UNIVERSITY SCIENCE INSTRUMENTS CENTRE  
DHARWAD**

Sample Information

Analyzed : 12/5/2014 1:22:06 PM  
Sample Name : E  
Data File : E:\data\Narahari\Narahari.qgd  
Method File : D:\method\DI METHOD.qgm  
Tuning File : D:\Tune\Tune\_30102014\_1.qgt  
Modified : 12/5/2014 1:32:34 PM

Spectrum

Line#:1 R.Time:6.2(Scan#:748)  
MassPeaks:74  
RawMode:Single 6.2(748) BasePeak:520(41588)  
BG Mode:None Group 1 - Event 1

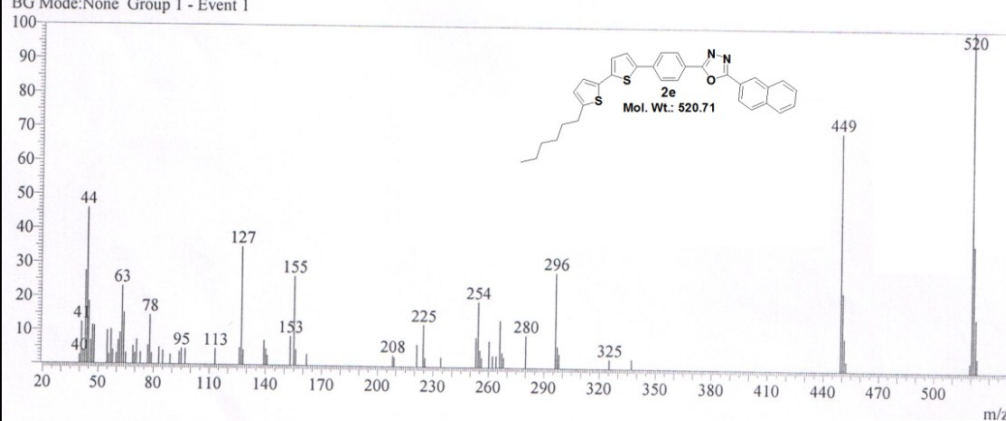

Supplement: c5ra14550c1.pdf [file c5ra14550c1.pdf]
